# Supplementary material for: miR-98 Modulates Cytokine Production from Human PBMCs in Systemic Lupus Erythematosus by Targeting IL-6 mRNA
Source: Hindawi journal article supplement (doi:10.1155/2019/9827574), 2019-12-01
Supplement: f1 [file 9827574.f1.pdf]

**Table S1** Primers for qRT-PCR

|                | right primer (5'-3')   | left primer (5'-3')  |
|----------------|------------------------|----------------------|
| IL-6           | CAAATTCGGTACATCCTC     | CTGGCTTGTCCTCACTA    |
| TNF- $\alpha$  | CACGCTCTTCTGCCTGCT     | GCTTGTCACTCGGGGTTT   |
| IL-8           | AGTGAAGATGCCAGTG       | TTCTAGCAAACCCATT     |
| IL-10          | TGCCTTCAGCAGAGTG       | GAGGGTCTTCAGGTTT     |
| IL-1 $\beta$   | TATTACAGTGGCAATGAGG    | GATGAAGGGAAAGAAGGT   |
| $\beta$ -actin | GGGCACGAAGGCTCATCATT   | AGCGAGCATCCCCAAAGTT  |
| U6             | CTCGCTTCGGCAGCACA      | AACGCTTCACGAATTTGCGT |
| miR-98 mimics  | UGAGGUAGUAAGUUGUAUUGUU |                      |
| mi-NC          | UUCUCCGAACGUGUCACGUTT  |                      |
